# Supplementary material
Source: Springer Nature journal article supplement (https://www.springermedizin.de/resource/supplementary/12958_2010_778_MOESM5_ESM.pdf/9568480)

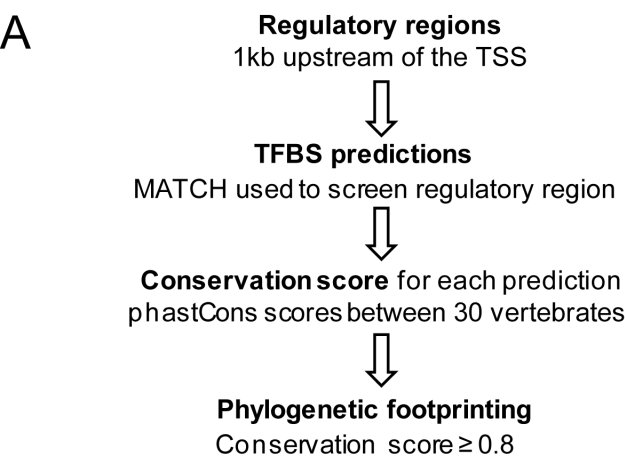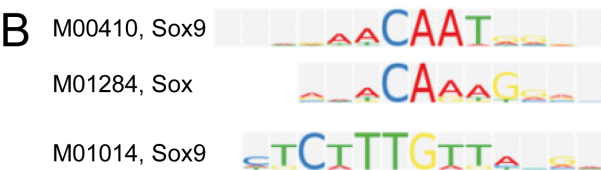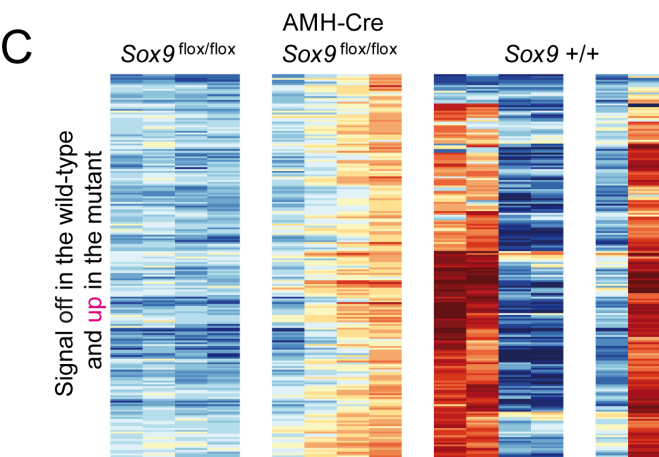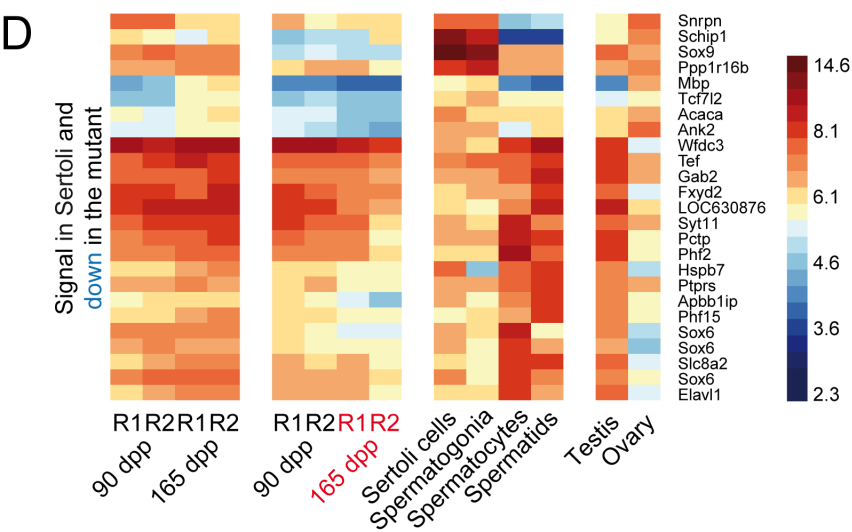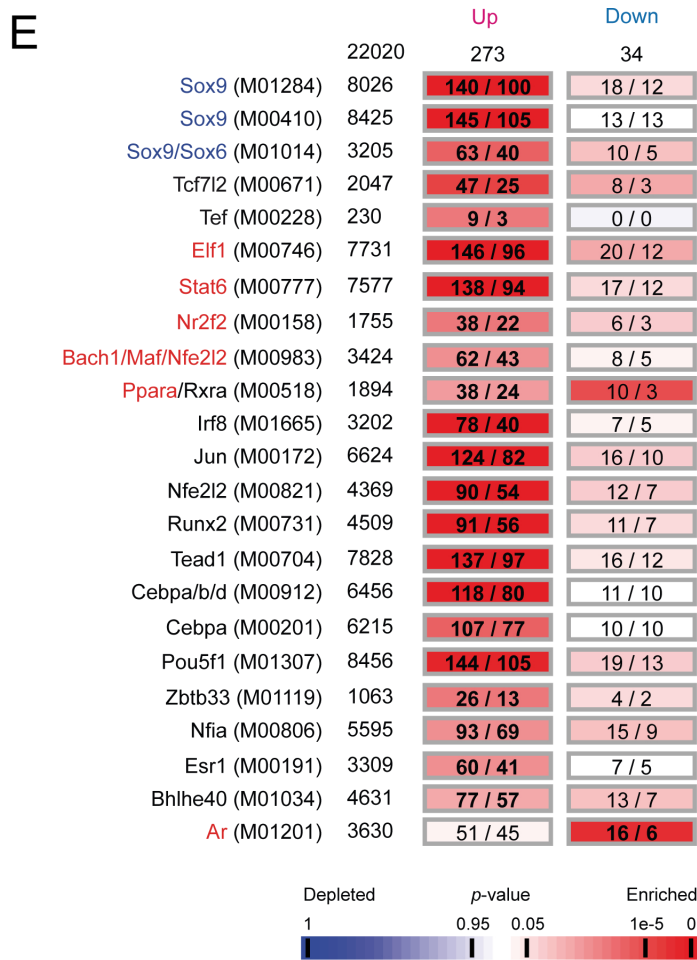

Supplement: MOESM5 [file 9568480]
